# Supplementary material for: Fluorine and phosphorus atoms cooperated on an N-doped 3D porous carbon network for enhanced ORR performance toward the zinc–air batteries
Source: Royal Society of Chemistry journal article supplement (doi:10.1039/d2ta09792c), 2023-01-01
Supplement: d2ta09792c1.pdf [file d2ta09792c1.pdf]

## **Supporting information**

**Fluorine and phosphorus atoms cooperated on an N-doped  
3D porous carbon network with enhanced ORR performance  
toward the zinc-air batteries**

## **Experimental section**

### **1.1. Chemicals**

Melamine (99%), 3-fluoroaniline (98%), phytic acid (70%), ammonium persulfate (98.5%), hydrochloric acid, aniline.

### **1.2. Synthesis of C<sub>3</sub>N<sub>4</sub>**

A certain amount of melamine was placed in a porcelain cup, which was heated up to 500°C and retained 2 hours at 500°C in a muffle furnace. After the temperature cooling to room temperature, the C<sub>3</sub>N<sub>4</sub> sample was obtained.

### **1.3. Synthesis of catalysts**

1.5g of C<sub>3</sub>N<sub>4</sub> was dispersed in 80 ml of 0.1mol/L hydrochloric acid solution, followed by the addition of 0.870ml of 3-fluoroaniline and phytic acid. 20ml of 0.1mol/L hydrochloric acid solution with 2g of ammonium persulfate were mixed above solution. The obtained mixtures were stirred at room temperature for 24 hours. After being filtered, washed and dried at 80°C for 8 hours, the precursor is obtained. Subsequently, precursor was placed in a tube furnace and heated up to 950 °C at 5 °C/min, and maintained at 950 °C for 2 hours, then cooled down naturally, the F/P-N-C-950 catalyst was prepared. Similarly, the P-N-C-950 catalyst was prepared by employing aniline to replace 3-fluoroaniline; F-N-C-950 catalyst was fabricated without the addition of phytic acid; N-C-950 catalyst was prepared without the addition of C<sub>3</sub>N<sub>4</sub>.

### **1.4. Electrochemical testing**

Electrochemical tests were performed in a three-electrode system using a CHI 760E electrochemical workstation. The Hg/HgO electrode was used as the reference electrode in the alkaline electrolyte, the carbon rod was used as the counter electrode,

and the glassy carbon electrode (GC, 0.196 cm<sup>2</sup>) was chosen as the working electrode. 5 mg of carbon catalyst was dispersed in 1 ml of nafion/isopropanol solution (0.25 wt% Nafion) with sonication. The 10 μL of catalyst ink was dropped on glassy carbon electrode, after drying, the final carbon catalyst loading is around 0.25 mg·cm<sup>-2</sup>. Cyclic voltammetry and linear scanning voltammetry were used to evaluate the catalytic performance in 0.1 M KOH solution. The stability of the catalyst was evaluated by chronoamperometry.

The rotating ring disc electrode (RRDE) testing was employed to investigate hydrogen peroxide yield (% hydrogen peroxide) and electron transfer number (n), and calculated as follows.

$$\text{H}_2\text{O}_2 (\%) = 200I_r (NI_d + I_r)^{-1}$$

$$n = 4 I_d (I_d + I_r N^{-1})^{-1}$$

Where  $I_d$  and  $I_r$  denoted the disk and ring currents and  $N$  is the ring collection efficiency.

In the home-made zinc-air battery, hydrophobic carbon paper (catalyst mass loading of 1 mg·cm<sup>-2</sup>), zinc flakes, and 6 M KOH solution were employed as the air cathode, anode, and electrolyte, respectively. The discharge curves of zinc air battery were obtained using the CHI760E workstation at room temperature. Constant current discharge measurements were conducted on a battery testing system (NEWARE).

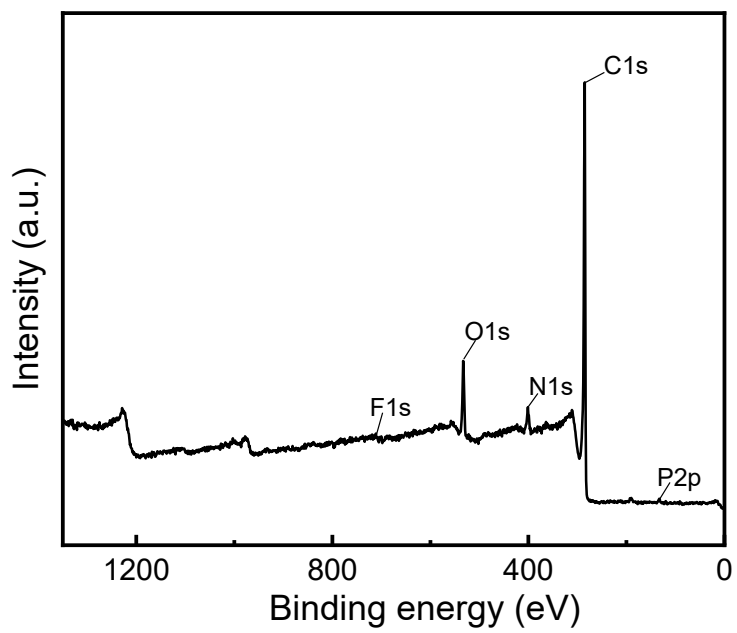

**Fig. S1** The XPS full spectrum for F/P-N-C-950 sample

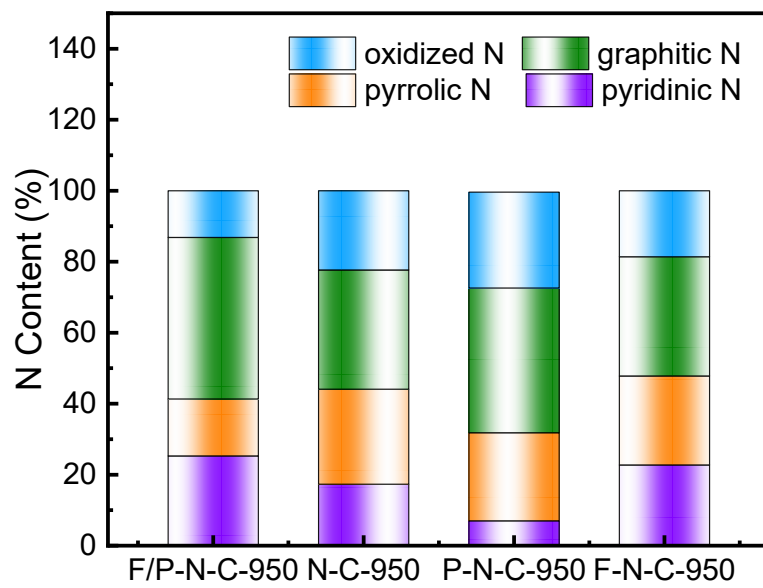

**Fig. S2** The content of different N species in the F/P-N-C-950, F-N-C-950, P-N-C-950, N-C-950 obtained from the fitting of XPS spectra.

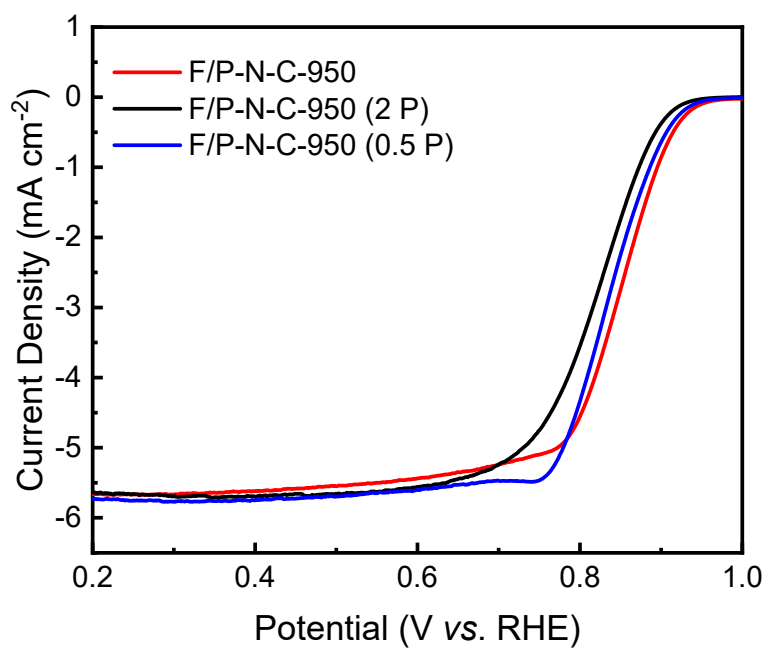

**Fig. S3** LSV curves for F/P-N-C-950, F/P-N-C-950 (0.5 P) and F/P-N-C-950 (2 P) in O<sub>2</sub>-saturated 0.1 M KOH.

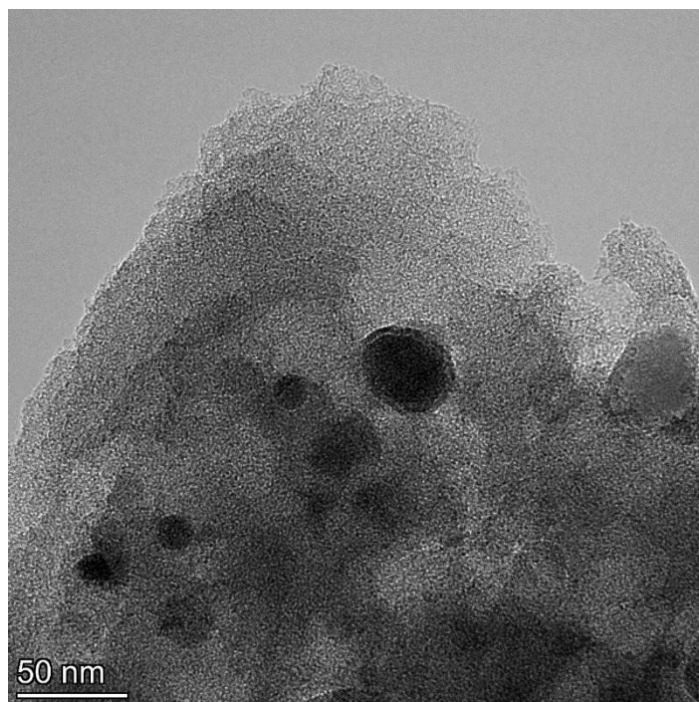

**Fig. S4** TEM image of F/P-C-950

**Table. S1** The comparison of ORR performance of F/P-N-C-950 and the recently reported carbon catalysts in alkaline solution.

| Materials          | $E_0$<br>(V vs. RHE) | $E_{1/2}$<br>(V vs. RHE) | Catalyst loading<br>( $\text{mg}\cdot\text{cm}^{-2}$ ) | References       |
|--------------------|----------------------|--------------------------|--------------------------------------------------------|------------------|
| <b>F/P-N-C-950</b> | <b>0.99</b>          | <b>0.848</b>             | <b>0.25</b>                                            | <b>This work</b> |
| FN <sub>3</sub> SG | 0.99                 | 0.803                    | 0.20                                                   | [1]              |
| B, N-Carbon        | 0.98                 | 0.840                    | 0.30                                                   | [2]              |
| NFCNAs-18-1000     | 0.91                 | 0.825                    | 0.10                                                   | [3]              |
| N, P, O-Carbon-PA  | 0.98                 | 0.840                    | 0.20                                                   | [4]              |
| NPS-G              | 0.96                 | 0.857                    | 0.40                                                   | [5]              |
| NPCSs              | 0.91                 | 0.830                    | 0.20                                                   | [6]              |
| PANI1-PATH2-CF     | —                    | 0.860                    | —                                                      | [7]              |
| N-F-CNFs-950       | 0.97                 | 0.833                    | —                                                      | [8]              |
| N, F-MCFs-A        | 0.94                 | 0.810                    | —                                                      | [9]              |
| N, P-GC-1000       | 1.03                 | 0.850                    | —                                                      | [10]             |
| N, P-SiCDC1        | 0.90                 | 0.790                    | —                                                      | [11]             |
| FeNC-24            | —                    | 0.852                    | —                                                      | [12]             |
| A-FeNC             | —                    | 0.850                    | —                                                      | [13]             |



**Table. S2** The comparison of zinc-air battery performance with F/P-N-C-950 and the recently reported carbon catalysts as cathodes.

| Materials          | Peak power density( $\text{mW}\cdot\text{cm}^{-2}$ ) | Specific capacity ( $\text{mAh}\cdot\text{g}^{-1}$ ) | References       |
|--------------------|------------------------------------------------------|------------------------------------------------------|------------------|
| <b>F/P-N-C-950</b> | <b>138</b>                                           | <b>821</b>                                           | <b>This work</b> |
| F-CHNS-900         | 130                                                  | —                                                    | [14]             |
| BNF-LCF            | 99                                                   | 791.5                                                | [15]             |
| NBF-CNW            | 175                                                  | —                                                    | [16]             |
| TD-CFs             | —                                                    | 555                                                  | [17]             |
| NBCNT-10           | 173                                                  | —                                                    | [18]             |
| NCN-1000-5         | 207                                                  | 672                                                  | [19]             |
| N-GRW              | 65                                                   | 873                                                  | [20]             |
| HPC(MV-c-PN)       | 80                                                   | —                                                    | [21]             |
| N-S-Cs-900         | 136                                                  | —                                                    | [22]             |
| N-rGO              | 139                                                  | 783                                                  | [23]             |
| N-PHCP-900         | 185                                                  | —                                                    | [24]             |
| D-NCNS             | 154                                                  | 815                                                  | [25]             |

## Reference

- [1] Y. Li, H. Wen, J. Yang, Y. Zhou, X. Cheng, Boosting oxygen reduction catalysis with N, F, and S tri-doped porous graphene: Tertiary N-precursors regulates the constitution of catalytic active sites, *Carbon*, 142 (2019) 1-12.
- [2] T. Sun, J. Wang, C. Qiu, X. Ling, B. Tian, W. Chen, C. Su, B. N Codoped and Defect-Rich Nanocarbon Material as a Metal-Free Bifunctional Electrocatalyst for Oxygen Reduction and Evolution Reactions, *Advanced Science*, 5 (2018) 1800036.
- [3] S. Fu, C. Zhu, J. Song, M.H. Engelhard, B. Xiao, D. Du, Y. Lin, Nitrogen and Fluorine-Codoped Carbon Nanowire Aerogels as Metal-Free Electrocatalysts for Oxygen Reduction Reaction, *Chemistry – A European Journal*, 23 (2017) 10460-10464.
- [4] Y. Li, J. Han, Z. Xu, R. Zhao, Y. Wang, R. Guo, N-, P-, and O-Tridoped Carbon Hollow Nanospheres with Openings in the Shell Surfaces: A Highly Efficient Electrocatalyst toward the ORR, *Langmuir*, 37 (2021) 2001-2010.
- [5] X. Zheng, J. Wu, X. Cao, J. Abbott, C. Jin, H. Wang, P. Strasser, R. Yang, X. Chen, G. Wu, N-, P-, and S-doped graphene-like carbon catalysts derived from onium salts with enhanced oxygen chemisorption for Zn-air battery cathodes, *Applied Catalysis B: Environmental*, 241 (2019) 442-451.
- [6] P. Li, H. Jang, J. Zhang, M. Tian, S. Chen, B. Yuan, Z. Wu, X. Liu, J. Cho, A Metal-Free N and P-Codoped Carbon Nanosphere as Bifunctional Electrocatalyst for Rechargeable Zinc-Air Batteries, *ChemElectroChem*, 6 (2019) 393-397.
- [7] J. Nong, M. Zhu, K. He, A. Zhu, P. Xie, M. Rong, M. Zhang, N/S co-doped 3D carbon framework prepared by a facile morphology-controlled solid-state pyrolysis method for oxygen reduction reaction in both acidic and alkaline media, *Journal of Energy Chemistry*, 34 (2019) 220-226.
- [8] L. Cao, X. Zhou, Z. Li, K. Su, B. Cheng, Nitrogen and fluorine hybridization state tuning in hierarchical honeycomb-like carbon nanofibers for optimized electrocatalytic ORR in alkaline and acidic electrolytes, *Journal of Power Sources*, 413 (2019) 376-383.
- [9] T. Gong, R. Qi, X. Liu, H. Li, Y. Zhang, N, F-Codoped Microporous Carbon Nanofibers as Efficient Metal-Free Electrocatalysts for ORR, *Nanomicro Lett*, 11 (2019) 9.
- [10] Z. Zhou, A. Chen, X. Fan, A. Kong, Y. Shan, Hierarchical porous N-P-coupled carbons as metal-free bifunctional electro-catalysts for oxygen conversion, *Applied Surface Science*, 464 (2019) 380-387.
- [11] I. Palm, E. Kibena-Pöldsepp, U. Mäeorg, J. Kozlova, M. Käärik, A. Kikas, J. Leis, V. Kisand, A. Tamm, K. Tammeveski, Silicon carbide-derived carbon electrocatalysts dual doped with nitrogen and phosphorus for the oxygen reduction reaction in an alkaline medium, *Electrochemistry Communications*, 125 (2021).
- [12] T. Wang, C. Sun, Y. Yan, F. Li, Understanding the active sites of Fe–N–C materials and their properties in the ORR catalysis system, *RSC Advances*, 12 (2022) 9543-9549.
- [13] M. Lv, H. Guo, H. Shen, J. Wang, J. Wang, Y. Shimakawa, M. Yang, Fe(3)C cluster-promoted single-atom Fe, N doped carbon for oxygen-reduction reaction, *Phys Chem Chem Phys*, 22 (2020) 7218-7223.
- [14] R. Jiang, Q. Zhi, W. Liu, Z. Gao, X. Zhan, Y. Jin, K. Wang, T. Sun, W. Li, J. Jiang, F-doped carbon hollow nanospheres for efficient electrochemical oxygen reduction, *Journal of Materials Science*, 57 (2022) 5924-5932.
- [15] Y. Wang, R. Gan, S. Zhao, W. Ma, X. Zhang, Y. Song, C. Ma, J. Shi, B. N, F tri-doped lignin-derived carbon nanofibers as an efficient metal-free bifunctional electrocatalyst for ORR and OER in

- rechargeable liquid/solid-state Zn-air batteries, *Applied Surface Science*, 598 (2022) 153891.
- [16] Z. Lu, Z. Li, S. Huang, J. Wang, R. Qi, H. Zhao, Q. Wang, Y. Zhao, Construction of 3D carbon network with N,B,F-tridoping for efficient oxygen reduction reaction electrocatalysis and high performance zinc air battery, *Applied Surface Science*, 507 (2020) 145154.
- [17] L. Wang, Y. Wang, M. Wu, Z. Wei, C. Cui, M. Mao, J. Zhang, X. Han, Q. Liu, J. Ma, Nitrogen, Fluorine, and Boron Ternary Doped Carbon Fibers as Cathode Electrocatalysts for Zinc–Air Batteries, *Small*, 14 (2018) 1800737.
- [18] P. Wei, X. Li, Z. He, X. Sun, Q. Liang, Z. Wang, C. Fang, Q. Li, H. Yang, J. Han, Y. Huang, Porous N, B co-doped carbon nanotubes as efficient metal-free electrocatalysts for ORR and Zn-air batteries, *Chemical Engineering Journal*, 422 (2021) 130134.
- [19] H. Jiang, J. Gu, X. Zheng, M. Liu, X. Qiu, L. Wang, W. Li, Z. Chen, X. Ji, J. Li, Defect-rich and ultrathin N doped carbon nanosheets as advanced trifunctional metal-free electrocatalysts for the ORR, OER and HER, *Energy & Environmental Science*, 12 (2019) 322-333.
- [20] H.B. Yang, J. Miao, S.-F. Hung, J. Chen, H.B. Tao, X. Wang, L. Zhang, R. Chen, J. Gao, H.M. Chen, L. Dai, B. Liu, Identification of catalytic sites for oxygen reduction and oxygen evolution in N-doped graphene materials: Development of highly efficient metal-free bifunctional electrocatalyst, *Science Advances*, 2 e1501122.
- [21] Z. Duan, G. Han, H. Huo, Z. Lin, L. Ge, C. Du, Y. Gao, G. Yin, Monovacancy Coupled Pyridinic N Site Enables Surging Oxygen Reduction Activity of Metal-Free CN<sub>x</sub> Catalyst, *ACS Sustainable Chemistry & Engineering*, 9 (2021) 1264-1271.
- [22] L. Xing, C. Song, A. Kong, N–S-codoped mesoporous carbons from melamine-2-thenaldehyde polymers on carbon nanotubes for oxygen reduction and Zn-air batteries, *Journal of Solid State Chemistry*, 287 (2020) 121348.
- [23] R. Song, X. Cao, X. Zhou, N. Yuan, N-Doped graphene supported on N-rGO nanosheets as metal-free oxygen reduction reaction electrocatalysts for Zn–air batteries, *New Journal of Chemistry*, 45 (2021) 21716-21724.
- [24] Y. Yang, Z. He, Y. Liu, S. Wang, H.-g. Wang, G. Zhu, Facile preparation of N-doped hierarchically porous carbon derived from pitch-based hyper-cross-linked polymers as an efficient metal-free catalyst for oxygen-reduction, *Applied Surface Science*, 565 (2021) 150579.
- [25] H. Gao, S. Wang, W.-C. Cheong, K. Wang, H. Xu, A. Huang, J. Ma, J. Li, W.-F. Ip, K. San Hui, D.A. Dinh, X. Fan, F. Bin, F. Chen, K.N. Hui, Topological defect and sp<sup>3</sup>/sp<sup>2</sup> carbon interface derived from ZIF-8 with linker vacancies for oxygen reduction reaction, *Carbon*, (2022).
